# Supplementary material for: The challenge of balancing model sensitivity and robustness in predicting yields: a benchmarking study of amide coupling reactions
Source: Royal Society of Chemistry journal article supplement (doi:10.1039/d3sc03902a), 2023-01-01
Supplement: d3sc03902a1.pdf [file d3sc03902a1.pdf]

## Supporting Information

### **The Challenge of Balancing Model Sensitivity and Robustness in Predicting Yields: A Benchmarking Study of Amide Coupling Reactions**

Zhen Liu<sup>1</sup>, Yurii S. Moroz<sup>2,3,4</sup>, Olexandr Isayev<sup>1\*</sup>

<sup>1</sup>Department of Chemistry, Mellon College of Science, Carnegie Mellon University, Pittsburgh, Pennsylvania 15213, USA

<sup>2</sup>*Enamine Ltd, Kyiv, 02660, Ukraine*

<sup>3</sup>*Chemspace LLC, Kyiv, 02094, Ukraine*

<sup>4</sup>*Taras Shevchenko National University of Kyiv, Kyiv, 01601, Ukraine*

\* Correspondence: olexandr@olexandrisayev.com (O.I.)

## Extraction and curation of amide coupling reactions

The dataset for amide coupling reactions was obtained by querying the Reaxys database using predefined reaction templates. These templates were constructed by initiating a "Quick search" within the Reaxys interface. Subsequently, a generic amide coupling reaction was drawn, and this template was then applied to formulate queries for the desired reactions.

The approach involved sketching reactions using the MarvinJS interface integrated into Reaxys, akin to the process one might undertake on a physical whiteboard. This interface offers a multitude of functionalities. For instance, it allows for the specification of "R" groups denoting various atom assemblies, mapping of atoms from reactants to products, and delineation of the catalyst by illustrating it above the reaction arrow. A comprehensive guide for fundamental operations can be accessed [here](#).

The initial download yielded approximately 195,800 amide coupling reactions catalyzed by carbodiimides. Subsequent refinement and curation procedures resulted in a final set of 41,239 reactions. For the sake of reproducibility, the Reaxys IDs corresponding to the reactions in our dataset can be found on the GitHub page: [https://github.com/isayevlab/amide\\_reaction\\_data](https://github.com/isayevlab/amide_reaction_data).

## Reaction mechanism

The amide coupling dataset involves 3 types of carbodiimides: EDC, DIC and DCC (**Figure S1**). O-acylisourea is the key intermediate during the formation of amide. It has two pathways to form the desired amide. It also undergoes a slow rearrangement, producing the side product N-acylurea.

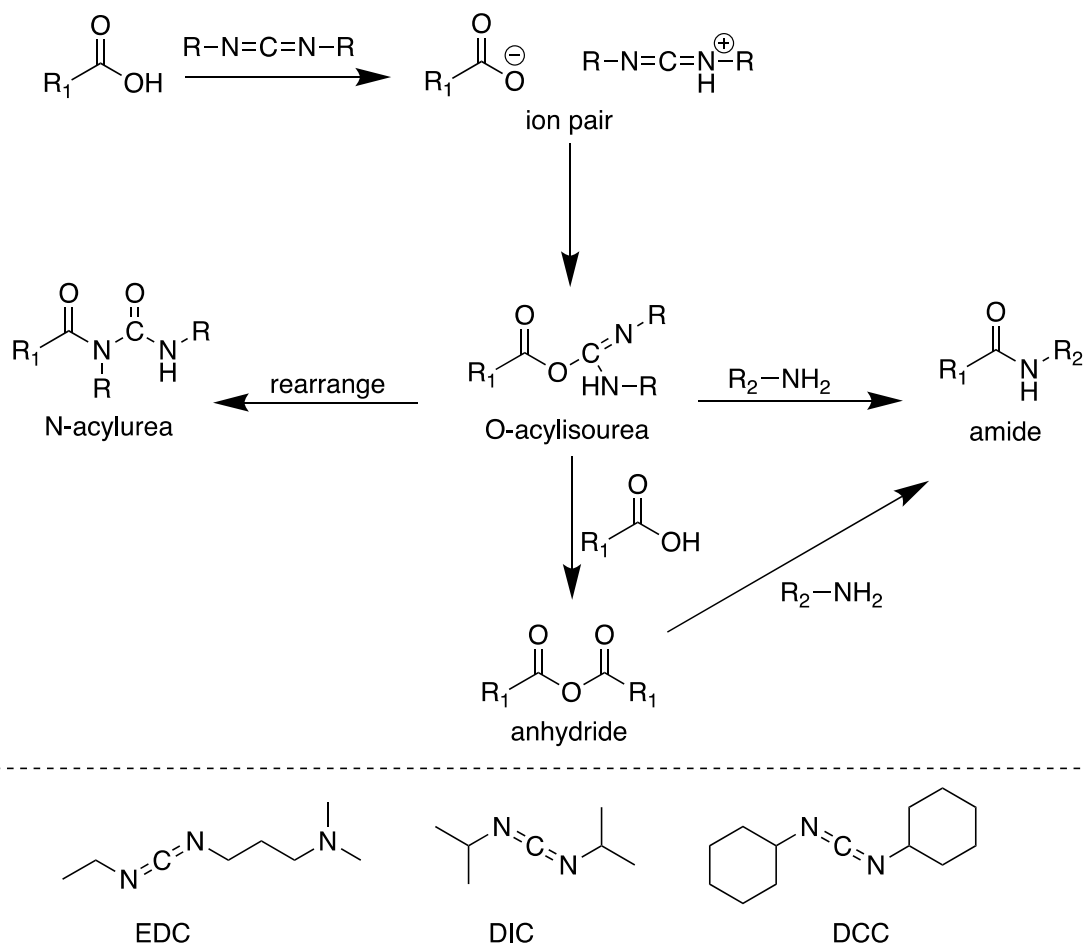

**Figure S1.** The mechanism for amide coupling catalyzed by carbodiimides.

## Generation of O-acylisourea

All reactions in the amide coupling dataset follow the same mechanism, so the intermediates can be obtained via SMARTS pattern mapping. Below is an example of transforming 10 carboxylic acids into 10 O-acylisoureas by the reaction between acids and EDCI (**Figure S2**).

```
In [1]:
from rdkit import Chem
from rdkit.Chem import rdChemReactions
from rdkit.Chem import Draw
import pandas as pd

def acylisourea(smiles):
    rxn = rdChemReactions.ReactionFromSmarts('[C:1](=[O:2])[OH].CCN=C=NCCCN(C)C>>CCN/C([O][C:1]=[O:2])=N\CCCN(C)C')
    reacts = (Chem.MolFromSmiles(smiles), Chem.MolFromSmiles('CCN=C=NCCCN(C)C'))
    products = rxn.RunReactants(reacts)
    return Chem.MolToSmiles(products[0][0])

In [3]:
# get 10 example acids
df = pd.read_csv('/home/zhen/Documents/data/datav4/data4_4.csv')

acids = []
for i in range(8):
    acids.append(df.iloc[i, 12])

In [4]:
# Initial acid molecules
acid_mols = []
for smi in acids:
    acid_mols.append(Chem.MolFromSmiles(smi))
Draw.MolsToGridImage(acid_mols, molsPerRow=4)

Out[4]:
```

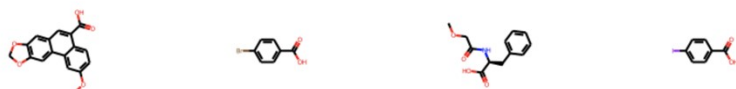

**Figure S2.** Example of generating O-acylisourea from acid and EDCI through SMARTS mapping

### Annotation of the reactive centers

**Algorithm 1** describes the process for identifying the reactive centers of the acids, amines and products. The isomorphic test was implemented via NetworkX<sup>1</sup>. It returns True if two groups of atoms have the same connectivity. For each molecule, the reactive center is the indexes of the reactive atoms in the molecular SDF format.

---

#### Algorithm 1. Amide Reaction Center Detector

---

**Input:** *acid, amine, product*

**Output:** reaction centers (*center*)

```
for every C-N bond in the target, do
    Break the product at the bond
    Re-construct pseudo-acid and/or pseudo-amine from the fragment(s)
    Isomorphic test between pseudo-acid and acid, pseudo-amine and amine
    if both tests are true, then
        return product-centers, pseudo-acid, pseudo-amine
    end if
end for

for atomi in the acid/amine, do
    Find the neighboring graph around atomi (Gi)
    for atomj in the fragment-acid/fragment-amine, do
        Find the neighboring graph around atomj (Gj)
        Isomorphic test on Gi and Gj
    end for
    if no atomj that has the same neighboring graph as atomi, then
        return acid/amine-center
    end if
end for
```

---

### Generation of QM descriptors

With the 3D structures from Auto3D<sup>2</sup>, the descriptors from **Table S1** can be calculated directly from AIMNET<sup>3</sup>. From these original descriptors, we derived 51 descriptors that capture the properties of the amide reactions in **Table S2**.

| <b>Descriptor</b> | <b>Data Type and Shape</b>                 | <b>Explanation</b>                                                                                              |
|-------------------|--------------------------------------------|-----------------------------------------------------------------------------------------------------------------|
| energy            | list, length=3                             | The energies for three states (+1, 0, -1) of the input molecule, unit eV                                        |
| energy_std        | list, length=3                             | Standard deviation from the AIMNET ensemble (5 models in total)                                                 |
| charges           | 2D list, (3, number of atoms)              | The atomic charges (summation of the alpha and beta charges) for three states (+1, 0, -1) of the input molecule |
| charges_std       | 3D list, (3, number of atoms, 2)           | Standard deviation of the atomic alpha and beta charge from the AIMNET ensemble                                 |
| ip                | float                                      | ionization potential, unit eV                                                                                   |
| ea                | float                                      | electron affinity, unit eV                                                                                      |
| f_el              | list, length=number of atoms (including H) | atomic Fukui functions for electronic attack                                                                    |
| f_nuc             | list, length=number of atoms (including H) | atomic Fukui function for nucleophilic attack                                                                   |
| f_rad             | list, length=number of atoms (including H) | atomic Fukui function for radical attack                                                                        |
| chi               | float                                      | electronegativity, unit eV                                                                                      |
| eta               | float                                      | hardness, unit eV                                                                                               |
| omega             | float                                      | electrophilicity index, unit eV                                                                                 |
| omega_el          | list, length=number of atoms (including H) | atomic electrophilicity index for electrophilic attack, unit eV                                                 |
| omega_nuc         | list, length=number of atoms (including H) | atomic electrophilicity index for nucleophilic attack, unit eV                                                  |
| omega_rad         | list, length=number of atoms (including H) | atomic electrophilicity index for radical attack, unit eV                                                       |

| <b>Descriptor</b>     | <b>Explanation</b>                                                         | <b>Formula</b>                                                                             |
|-----------------------|----------------------------------------------------------------------------|--------------------------------------------------------------------------------------------|
| $\Delta E_{rxn}^{el}$ | electronic reaction energy                                                 | $\Delta E_{rxn}^{el} = E_{product}^{el} + E_{water}^{el} - E_{acid}^{el} - E_{amine}^{el}$ |
| $\Delta E_i^{el}$     | the electronic energy difference between the intermediate and the reactant | $\Delta E_i^{el} = E_{intermediate}^{el} - E_{acid}^{el} - E_{catalyst}^{el}$              |

|                 |                                            |                                                                                          |
|-----------------|--------------------------------------------|------------------------------------------------------------------------------------------|
| rxn_acid_fukui  | Fukui index                                | $f_{amine\ center}^{nuc} - f_{amine\ center}^{rad}$                                      |
| rxn_amine_fukui | Fukui index                                | $f_{acid\ center}^{el} - f_{acid\ center}^{nuc}$                                         |
| rxn_fukui       | Fukui index                                | $f_{rxn} = f_{amine\ center}^{nuc} - f_{amine\ center}^{rad} - (f_{acid\ center}^{el} -$ |
| acid_ip         | ionization energy potential                | $IP_{acid}$                                                                              |
| amine_ip        | ionization energy potential                | $IP_{amine}$                                                                             |
| p_ip            | ionization energy potential                | $IP_{product}$                                                                           |
| aa_ip           | ionization energy potential                | $IP_{amine} - IP_{acid}$                                                                 |
| rxn_ip          | ionization energy potential                | $IP_{rxn} = IP_{product} - IP_{acid} - IP_{amine}$                                       |
| acid_ea         | electron affinity                          | $EA_{acid}$                                                                              |
| amine_ea        | electron affinity                          | $EA_{amine}$                                                                             |
| p_ea            | electron affinity                          | $EA_{product}$                                                                           |
| aa_ea           | electron affinity                          | $EA_{amine} - EA_{acid}$                                                                 |
| rxn_ea          | electron affinity                          | $EA_{rxn} = EA_{product} - EA_{acid} - EA_{amine}$                                       |
| acid_chi        | electronegativity                          | $\chi_{acid}$                                                                            |
| amine_chi       | electronegativity                          | $\chi_{amine}$                                                                           |
| p_chi           | electronegativity                          | $\chi_{product}$                                                                         |
| aa_chi          | electronegativity                          | $\chi_{amine} - \chi_{acid}$                                                             |
| rxn_chi         | electronegativity                          | $\chi_{rxn} = \chi_{product} - \chi_{acid} - \chi_{amine}$                               |
| acid_eta        | hardness                                   | $\eta_{acid}$                                                                            |
| amine_eta       | hardness                                   | $\eta_{amine}$                                                                           |
| p_eta           | hardness                                   | $\eta_{product}$                                                                         |
| aa_eta          | hardness                                   | $\eta_{amine} - \eta_{acid}$                                                             |
| rxn_eta         | hardness                                   | $\eta_{rxn} = \eta_{product} - \eta_{acid} - \eta_{amine}$                               |
| acid_omega      | electrophilicity index                     | $\omega_{acid}$                                                                          |
| amine_omega     | electrophilicity index                     | $\omega_{amine}$                                                                         |
| p_omega         | electrophilicity index                     | $\omega_{product}$                                                                       |
| aa_omega        | electrophilicity index                     | $\omega_{amine} - \omega_{acid}$                                                         |
| rxn_omega       | electrophilicity index                     | $\omega_{rxn} = \omega_{product} - \omega_{acid} - \omega_{amine}$                       |
| C_charge        | atomic charge on the acid carbon center    |                                                                                          |
| N_charge        | atomic charge on the amine nitrogen center |                                                                                          |

|            |                                                       |
|------------|-------------------------------------------------------|
| pC_charge  | atomic charge on the product carbon center            |
| pN_charge  | atomic charge on the product nitrogen center          |
| pCC_charge | $pCC\_charge = pC\_charge - C\_charge$                |
| pNN_charge | $pNN\_charge = pN\_charge - N\_charge$                |
| CN_charge  | $CN\_charge = N\_charge - C\_charge$                  |
| C_fukui    | Fukui index on the acid carbon center                 |
| N_fukui    | Fukui index on the amine nitrogen center              |
| pC_fukui   | Fukui index on the product carbon center              |
| pN_fukui   | Fukui index on the product nitrogen center            |
| pCC_fukui  | $pCC\_fukui = pC\_fukui - C\_fukui$                   |
| pNN_fukui  | $pNN\_fukui = pN\_fukui - N\_fukui$                   |
| CN_fukui   | $CN\_fukui = N\_fukui - C\_fukui$                     |
| C_omega    | electrophilicity index on the acid carbon center      |
| N_omega    | electrophilicity index on the amine nitrogen center   |
| pC_omega   | electrophilicity index on the product carbon center   |
| pN_omega   | electrophilicity index on the product nitrogen center |
| pCC_omega  | $pCC\_omega = pC\_omega - C\_omega$                   |
| pNN_omega  | $pNN\_omega = pN\_omega - N\_omega$                   |
| CN_omega   | $CN\_omega = N\_omega - C\_omega$                     |

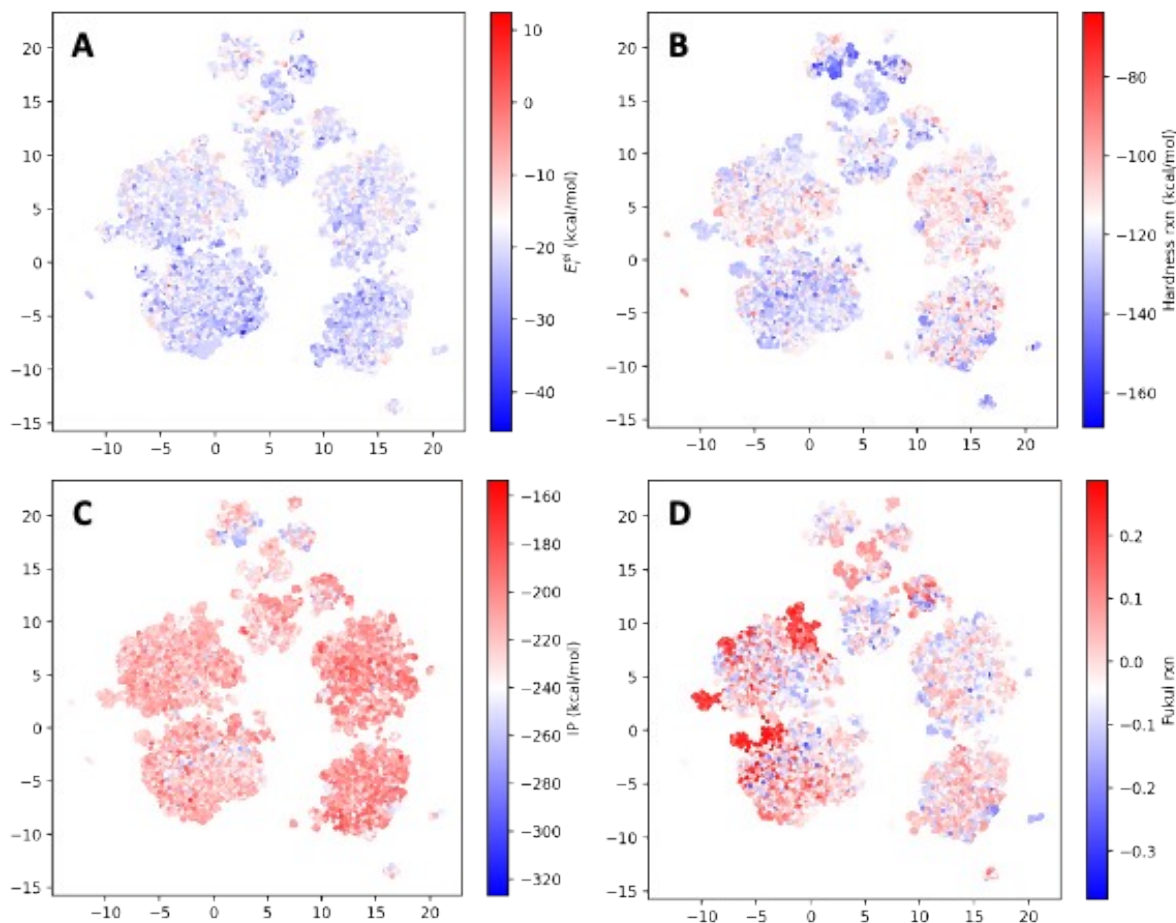

**Figure S3.** UMAP projection of the reaction space colored by additional QM features.

### Generation of AEV and Mordred descriptors

The atomic environment vector (AEV) descriptor was calculated using the AEV computer in TorchANI<sup>4</sup>. We considered 12 elements for the AEV calculator to cover all the molecules in the amide coupling dataset. The conversion rule from the atomic number to the atomic index in TorchANI was {1:0, 5: 1, 6: 2, 7: 3, 8: 4, 9: 5, 14: 6, 15: 7, 16: 8, 17: 9, 35: 10, 53: 11}. The other parameters for the AEV computer are default values. The resulting AEV has a dimension of 2,688. Since many columns contain mostly the same values, we only kept the AEV features of which the variance is at least 0.0001. The final AEV feature length is 1,716.

The Mordred descriptor was calculated using the Mordred package<sup>5</sup>. The original Mordred descriptor contains 1,826 features. After removing features with missing values, we ended up with 1648 features.



### **Amide coupling dataset statistics**

After downloading from Reaxys, reactions involving organometallic compounds or very large molecules were excluded. After processing, each reactant contains no more than 100 atoms, and each product contains no more than 150 atoms. The raw dataset contained approximately 195,800 amide coupling reactions with different catalysts, from which we sampled a subset of reactions that are catalyzed by carbodiimides. The carbodiimides include N,N'-Dicyclohexylcarbodiimide (DCC), 1-Ethyl-3-(3-dimethylaminopropyl)carbodiimide (EDC) and N,N'-Diisopropylcarbodiimide (DIC).

The amide coupling dataset contains 41,239 reactions, which consist of 111,071 unique molecules. There are hundreds to thousands of low-yield reactions, although the yield distribution is left-skewed (i.e., most reactions have high yields). Most reactions involve medium to large molecules because the product molecular weight is between 250 to 650. More statistics about the dataset can be found in **Figure S4 and S5**.

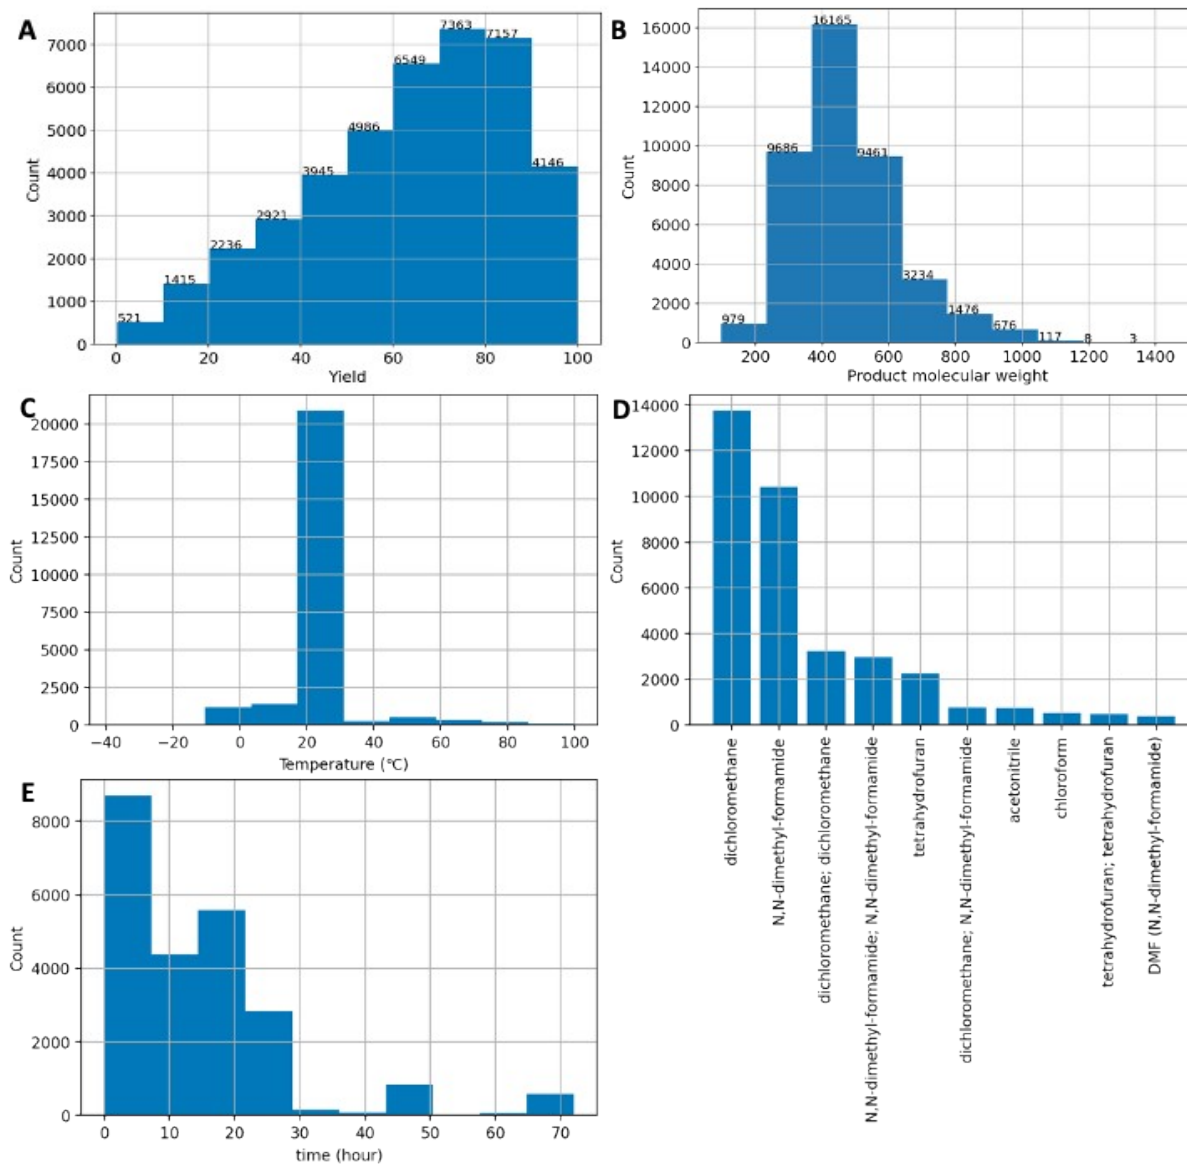

**Figure S4.** The distribution of reaction yield (A), size (B), temperature (C), solvent (D) and time (E).

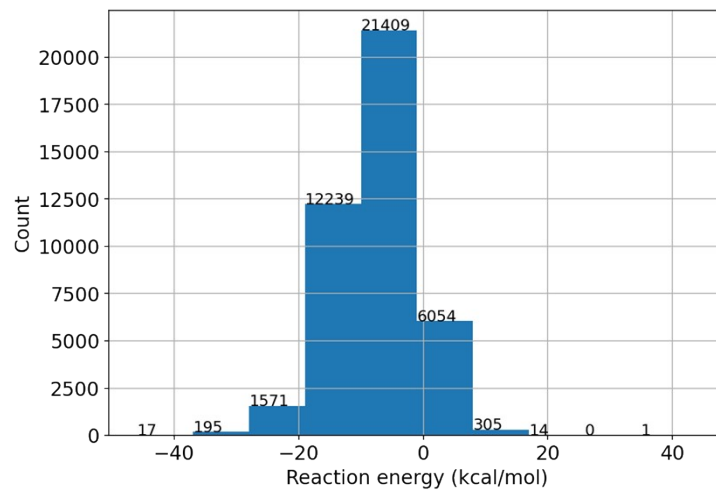

**Figure S5. The distribution of electronic reaction energy**

## The MAE metric on the amide coupling dataset and the Buchwald-Hartwig dataset

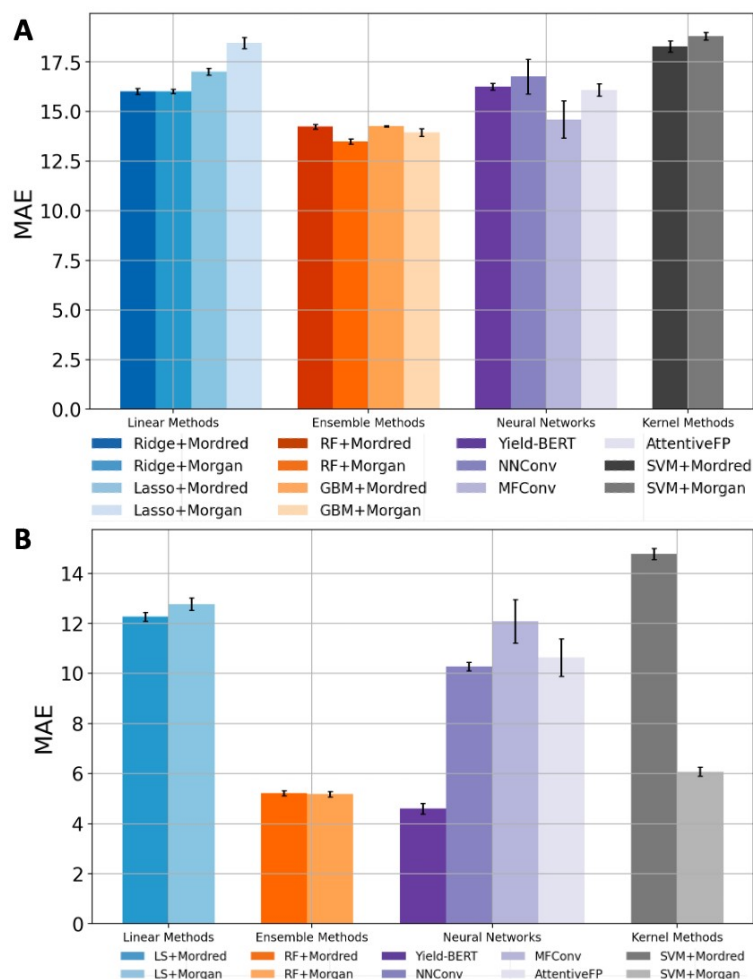

**Figure S6. The MAE metric for yield prediction on the amide coupling dataset (A) and Buchwald-Hartwig dataset (B).**

### Recursive feature elimination (RFE)

RFE is a technique for selecting the most informative features. The process is as follows: a model is first trained using the full features. The features are then ranked by the importance assigned by this trained model. A subset of the features will be pruned based on the importance ranking. The remaining features are used to train another model, then we further prune the features based on the new importance scores... This process is repeated until the total number of features decreases to a specific threshold. In our case, we trained an RF at each step and used it for feature

selection. At each step, we removed the bottom 20% of the features based on the importance ranking. **Figure S7** summarizes the model performance along the feature elimination process.

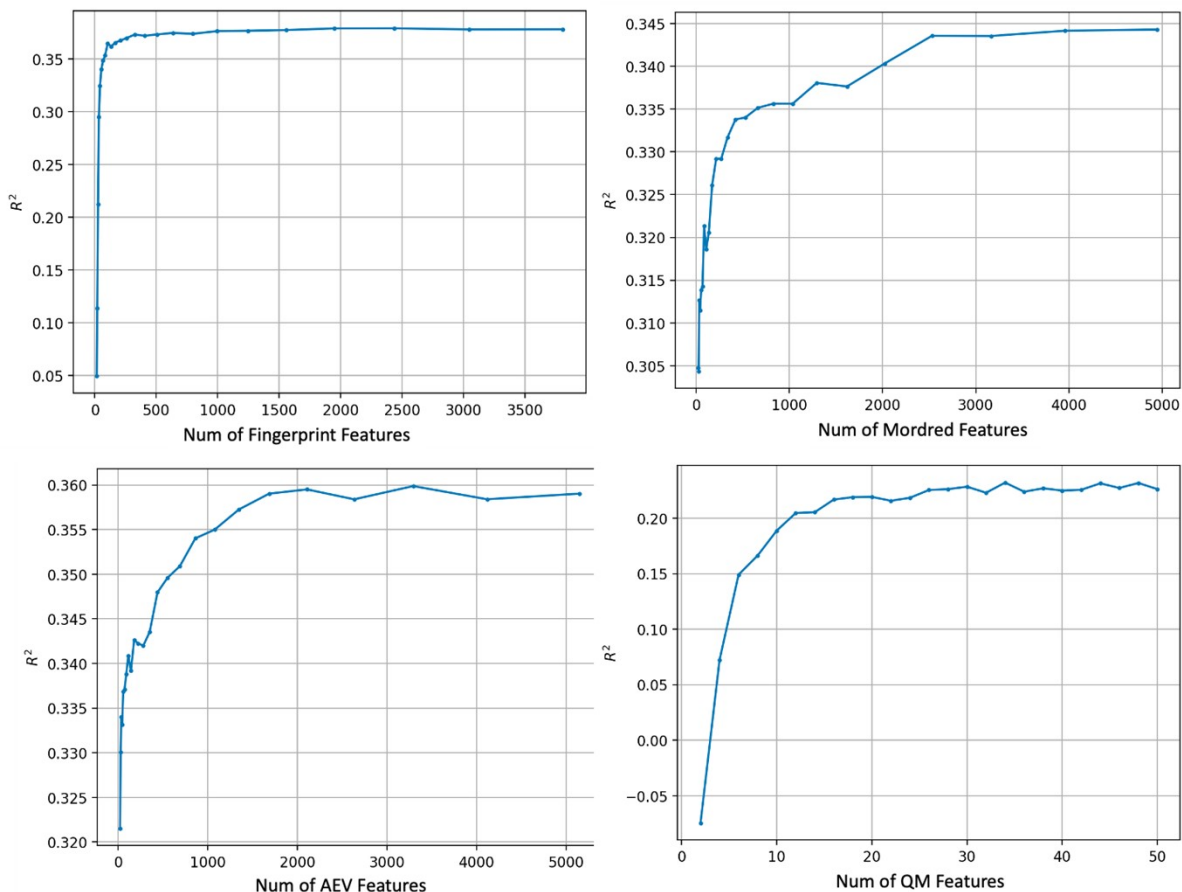

**Figure S7.** The model performance during the feature elimination process.

**Figure S8** displays the top-10 most important features for each descriptor as identified during the Recursive Feature Elimination (RFE) process. The importance on the x-axis is derived from the "feature\_importance\_" attribute of a trained random forest, computed based on the mean decrease in impurity within each tree.

In Panel A, the y-axis portrays the substructure or condition linked with each bit of the fingerprint. In Panel B, the y-axis elucidates the physical significance of individual features within the Mordred descriptor. Panel C's y-axis signifies the coordinates of the top-10 features of the AEV, although the AEV descriptor lacks a corresponding physical interpretation. Meanwhile, in Panel D, the y-axis represents the QM terms, as outlined in **Table S2**.

It is worth noting that despite the heightened importance of the QM terms in comparison to other features, relying solely on the QM descriptor did not yield satisfactory performance.

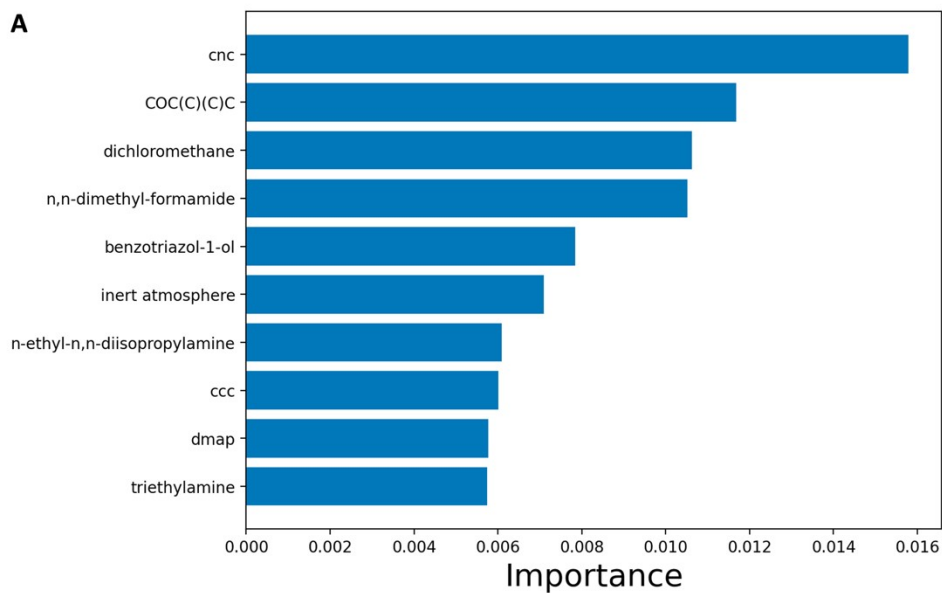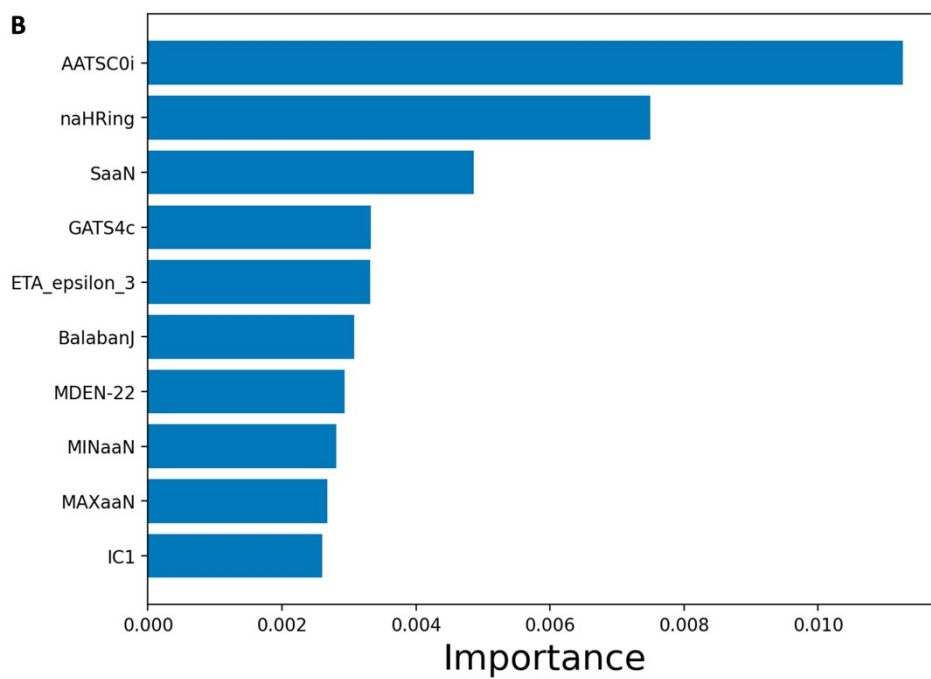

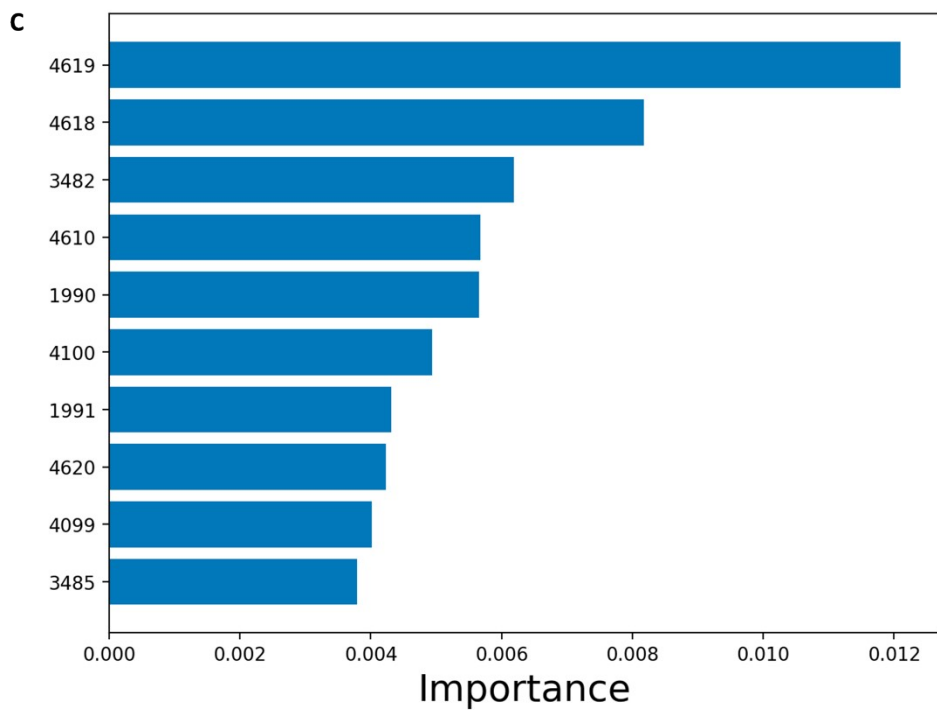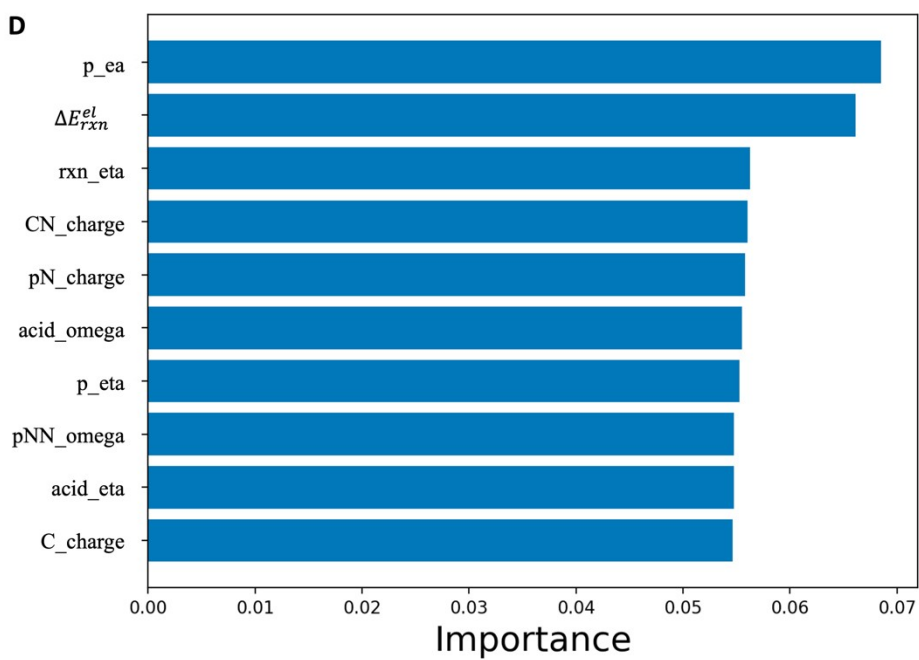

**Figure S8.** The top-10 most important features in the fingerprint descriptor (A), Mordred descriptor (B), AEV descriptor (C) and the QM descriptor (D).

### Yield prediction performance on different amine types

For each type of amine, 90% of the data was allocated for training purposes, while the remaining 10% was reserved for testing. The identical stacking technique and descriptors, as discussed in the main text, were employed in this context as well.

| <b>Amine Category</b> | primary aliphatic | primary aromatic | secondary |
|-----------------------|-------------------|------------------|-----------|
| <b>Subset Size</b>    | 28,067            | 12,530           | 634       |
| <b>R<sup>2</sup></b>  | 0.363             | 0.425            | 0.424     |
| <b>MAE (%)</b>        | 13.29             | 13.42            | 14.29     |

### Model performance after injecting artificial negative reactions

The following experiments were done using reaction context and fingerprint as the descriptor. The artificial negative reactions were produced by changing the fingerprint bits for the acid or amine to be all zeros and then assigning the reaction yield as 0. The logic behind these artificial negative data points was that the reaction cannot happen when either acid or amine was missing.

| <b>Model</b> | <b>Percent of negative data points in the training set</b> | <b>R<sup>2</sup></b> | <b>MAE (%)</b> |
|--------------|------------------------------------------------------------|----------------------|----------------|
| RF           | 0                                                          | 0.348                | 13.97          |
|              | 20                                                         | 0.341                | 14.07          |
|              | 50                                                         | 0.340                | 14.07          |
|              | 100                                                        | 0.342                | 14.06          |
| MLP          | 0                                                          | 0.331                | 14.03          |
|              | 20                                                         | 0.331                | 13.91          |
|              | 50                                                         | 0.312                | 13.98          |
|              | 100                                                        | 0.312                | 13.98          |

### Comparison between the HTE dataset and the amide dataset

The details of the HTE dataset was discussed by Doyle et al<sup>6</sup>. We added the side-by-side comparison of the HTE dataset and the amide dataset curated in this work. Compared with the HTE dataset, the amide dataset is around 10 times larger in terms of reaction size, around 1500 times larger in terms of unique molecules, and contains comprehensive (though not complete) information about molecules and reactions. Besides the difference in dataset size, a notable difference is the yield distribution. For the HTE dataset, a larger portion of the reactions have low yields, but a large portion of reactions have high yields for the amide dataset. It is commonly



believed that lacking negative reaction is a major reason for the poor performance on large literature dataset. However, the  $R^2$  can be as low as 0.2 even on a large electronic notebook dataset where there is a large portion of negative examples<sup>7</sup>. This phenomenon indicates the existence of other factors that degrading model performance in yield prediction. Compared with other literature dataset, a unique advantage of our amide dataset is that all reactions follow the same mechanism. We could identify many similar reactions and observe how subtle structure change could lead to the difference in the final yield, providing the opportunity to observe the reactivity cliffs and uncertain yields.

| <b>Metric</b>              | <b>HTE dataset</b>                                                                                                                                                                                                                                                                                                                                                                                                                                                                                                                   | <b>Amide dataset</b>                                                                 |       |      |      |       |     |       |     |       |     |       |     |       |     |       |     |       |     |       |     |        |    |                                                                                                                                                                                                                                                                                                                                                                                                                                                                                                                                                 |           |       |      |     |       |      |       |      |       |      |       |      |       |      |       |      |       |      |       |      |        |      |
|----------------------------|--------------------------------------------------------------------------------------------------------------------------------------------------------------------------------------------------------------------------------------------------------------------------------------------------------------------------------------------------------------------------------------------------------------------------------------------------------------------------------------------------------------------------------------|--------------------------------------------------------------------------------------|-------|------|------|-------|-----|-------|-----|-------|-----|-------|-----|-------|-----|-------|-----|-------|-----|-------|-----|--------|----|-------------------------------------------------------------------------------------------------------------------------------------------------------------------------------------------------------------------------------------------------------------------------------------------------------------------------------------------------------------------------------------------------------------------------------------------------------------------------------------------------------------------------------------------------|-----------|-------|------|-----|-------|------|-------|------|-------|------|-------|------|-------|------|-------|------|-------|------|-------|------|--------|------|
| Number of reactions        | 4,608                                                                                                                                                                                                                                                                                                                                                                                                                                                                                                                                | 41,239                                                                               |       |      |      |       |     |       |     |       |     |       |     |       |     |       |     |       |     |       |     |        |    |                                                                                                                                                                                                                                                                                                                                                                                                                                                                                                                                                 |           |       |      |     |       |      |       |      |       |      |       |      |       |      |       |      |       |      |       |      |        |      |
| Number of unique reactants | 45 (15 aryl halides, 23 additives, 4 Pd catalysts, 3 bases)                                                                                                                                                                                                                                                                                                                                                                                                                                                                          | 70,081 (16,285 acids, 12,598 amines, 3 carbodiimide catalysts, 17,518 intermediates) |       |      |      |       |     |       |     |       |     |       |     |       |     |       |     |       |     |       |     |        |    |                                                                                                                                                                                                                                                                                                                                                                                                                                                                                                                                                 |           |       |      |     |       |      |       |      |       |      |       |      |       |      |       |      |       |      |       |      |        |      |
| 3D structure               | NO                                                                                                                                                                                                                                                                                                                                                                                                                                                                                                                                   | Yes                                                                                  |       |      |      |       |     |       |     |       |     |       |     |       |     |       |     |       |     |       |     |        |    |                                                                                                                                                                                                                                                                                                                                                                                                                                                                                                                                                 |           |       |      |     |       |      |       |      |       |      |       |      |       |      |       |      |       |      |       |      |        |      |
| Intermediate               | NO                                                                                                                                                                                                                                                                                                                                                                                                                                                                                                                                   | Yes                                                                                  |       |      |      |       |     |       |     |       |     |       |     |       |     |       |     |       |     |       |     |        |    |                                                                                                                                                                                                                                                                                                                                                                                                                                                                                                                                                 |           |       |      |     |       |      |       |      |       |      |       |      |       |      |       |      |       |      |       |      |        |      |
| Context                    | NO                                                                                                                                                                                                                                                                                                                                                                                                                                                                                                                                   | Yes                                                                                  |       |      |      |       |     |       |     |       |     |       |     |       |     |       |     |       |     |       |     |        |    |                                                                                                                                                                                                                                                                                                                                                                                                                                                                                                                                                 |           |       |      |     |       |      |       |      |       |      |       |      |       |      |       |      |       |      |       |      |        |      |
| Yield distribution         | <table border="1"> <caption>HTE Dataset Yield Distribution</caption> <thead> <tr> <th>Yield Bin</th> <th>Count</th> </tr> </thead> <tbody> <tr><td>0-10</td><td>1243</td></tr> <tr><td>10-20</td><td>554</td></tr> <tr><td>20-30</td><td>420</td></tr> <tr><td>30-40</td><td>476</td></tr> <tr><td>40-50</td><td>437</td></tr> <tr><td>50-60</td><td>301</td></tr> <tr><td>60-70</td><td>303</td></tr> <tr><td>70-80</td><td>266</td></tr> <tr><td>80-90</td><td>228</td></tr> <tr><td>90-100</td><td>84</td></tr> </tbody> </table> | Yield Bin                                                                            | Count | 0-10 | 1243 | 10-20 | 554 | 20-30 | 420 | 30-40 | 476 | 40-50 | 437 | 50-60 | 301 | 60-70 | 303 | 70-80 | 266 | 80-90 | 228 | 90-100 | 84 | <table border="1"> <caption>Amide Dataset Yield Distribution</caption> <thead> <tr> <th>Yield Bin</th> <th>Count</th> </tr> </thead> <tbody> <tr><td>0-10</td><td>521</td></tr> <tr><td>10-20</td><td>1415</td></tr> <tr><td>20-30</td><td>2236</td></tr> <tr><td>30-40</td><td>2921</td></tr> <tr><td>40-50</td><td>3945</td></tr> <tr><td>50-60</td><td>4986</td></tr> <tr><td>60-70</td><td>6549</td></tr> <tr><td>70-80</td><td>7363</td></tr> <tr><td>80-90</td><td>7157</td></tr> <tr><td>90-100</td><td>4146</td></tr> </tbody> </table> | Yield Bin | Count | 0-10 | 521 | 10-20 | 1415 | 20-30 | 2236 | 30-40 | 2921 | 40-50 | 3945 | 50-60 | 4986 | 60-70 | 6549 | 70-80 | 7363 | 80-90 | 7157 | 90-100 | 4146 |
| Yield Bin                  | Count                                                                                                                                                                                                                                                                                                                                                                                                                                                                                                                                |                                                                                      |       |      |      |       |     |       |     |       |     |       |     |       |     |       |     |       |     |       |     |        |    |                                                                                                                                                                                                                                                                                                                                                                                                                                                                                                                                                 |           |       |      |     |       |      |       |      |       |      |       |      |       |      |       |      |       |      |       |      |        |      |
| 0-10                       | 1243                                                                                                                                                                                                                                                                                                                                                                                                                                                                                                                                 |                                                                                      |       |      |      |       |     |       |     |       |     |       |     |       |     |       |     |       |     |       |     |        |    |                                                                                                                                                                                                                                                                                                                                                                                                                                                                                                                                                 |           |       |      |     |       |      |       |      |       |      |       |      |       |      |       |      |       |      |       |      |        |      |
| 10-20                      | 554                                                                                                                                                                                                                                                                                                                                                                                                                                                                                                                                  |                                                                                      |       |      |      |       |     |       |     |       |     |       |     |       |     |       |     |       |     |       |     |        |    |                                                                                                                                                                                                                                                                                                                                                                                                                                                                                                                                                 |           |       |      |     |       |      |       |      |       |      |       |      |       |      |       |      |       |      |       |      |        |      |
| 20-30                      | 420                                                                                                                                                                                                                                                                                                                                                                                                                                                                                                                                  |                                                                                      |       |      |      |       |     |       |     |       |     |       |     |       |     |       |     |       |     |       |     |        |    |                                                                                                                                                                                                                                                                                                                                                                                                                                                                                                                                                 |           |       |      |     |       |      |       |      |       |      |       |      |       |      |       |      |       |      |       |      |        |      |
| 30-40                      | 476                                                                                                                                                                                                                                                                                                                                                                                                                                                                                                                                  |                                                                                      |       |      |      |       |     |       |     |       |     |       |     |       |     |       |     |       |     |       |     |        |    |                                                                                                                                                                                                                                                                                                                                                                                                                                                                                                                                                 |           |       |      |     |       |      |       |      |       |      |       |      |       |      |       |      |       |      |       |      |        |      |
| 40-50                      | 437                                                                                                                                                                                                                                                                                                                                                                                                                                                                                                                                  |                                                                                      |       |      |      |       |     |       |     |       |     |       |     |       |     |       |     |       |     |       |     |        |    |                                                                                                                                                                                                                                                                                                                                                                                                                                                                                                                                                 |           |       |      |     |       |      |       |      |       |      |       |      |       |      |       |      |       |      |       |      |        |      |
| 50-60                      | 301                                                                                                                                                                                                                                                                                                                                                                                                                                                                                                                                  |                                                                                      |       |      |      |       |     |       |     |       |     |       |     |       |     |       |     |       |     |       |     |        |    |                                                                                                                                                                                                                                                                                                                                                                                                                                                                                                                                                 |           |       |      |     |       |      |       |      |       |      |       |      |       |      |       |      |       |      |       |      |        |      |
| 60-70                      | 303                                                                                                                                                                                                                                                                                                                                                                                                                                                                                                                                  |                                                                                      |       |      |      |       |     |       |     |       |     |       |     |       |     |       |     |       |     |       |     |        |    |                                                                                                                                                                                                                                                                                                                                                                                                                                                                                                                                                 |           |       |      |     |       |      |       |      |       |      |       |      |       |      |       |      |       |      |       |      |        |      |
| 70-80                      | 266                                                                                                                                                                                                                                                                                                                                                                                                                                                                                                                                  |                                                                                      |       |      |      |       |     |       |     |       |     |       |     |       |     |       |     |       |     |       |     |        |    |                                                                                                                                                                                                                                                                                                                                                                                                                                                                                                                                                 |           |       |      |     |       |      |       |      |       |      |       |      |       |      |       |      |       |      |       |      |        |      |
| 80-90                      | 228                                                                                                                                                                                                                                                                                                                                                                                                                                                                                                                                  |                                                                                      |       |      |      |       |     |       |     |       |     |       |     |       |     |       |     |       |     |       |     |        |    |                                                                                                                                                                                                                                                                                                                                                                                                                                                                                                                                                 |           |       |      |     |       |      |       |      |       |      |       |      |       |      |       |      |       |      |       |      |        |      |
| 90-100                     | 84                                                                                                                                                                                                                                                                                                                                                                                                                                                                                                                                   |                                                                                      |       |      |      |       |     |       |     |       |     |       |     |       |     |       |     |       |     |       |     |        |    |                                                                                                                                                                                                                                                                                                                                                                                                                                                                                                                                                 |           |       |      |     |       |      |       |      |       |      |       |      |       |      |       |      |       |      |       |      |        |      |
| Yield Bin                  | Count                                                                                                                                                                                                                                                                                                                                                                                                                                                                                                                                |                                                                                      |       |      |      |       |     |       |     |       |     |       |     |       |     |       |     |       |     |       |     |        |    |                                                                                                                                                                                                                                                                                                                                                                                                                                                                                                                                                 |           |       |      |     |       |      |       |      |       |      |       |      |       |      |       |      |       |      |       |      |        |      |
| 0-10                       | 521                                                                                                                                                                                                                                                                                                                                                                                                                                                                                                                                  |                                                                                      |       |      |      |       |     |       |     |       |     |       |     |       |     |       |     |       |     |       |     |        |    |                                                                                                                                                                                                                                                                                                                                                                                                                                                                                                                                                 |           |       |      |     |       |      |       |      |       |      |       |      |       |      |       |      |       |      |       |      |        |      |
| 10-20                      | 1415                                                                                                                                                                                                                                                                                                                                                                                                                                                                                                                                 |                                                                                      |       |      |      |       |     |       |     |       |     |       |     |       |     |       |     |       |     |       |     |        |    |                                                                                                                                                                                                                                                                                                                                                                                                                                                                                                                                                 |           |       |      |     |       |      |       |      |       |      |       |      |       |      |       |      |       |      |       |      |        |      |
| 20-30                      | 2236                                                                                                                                                                                                                                                                                                                                                                                                                                                                                                                                 |                                                                                      |       |      |      |       |     |       |     |       |     |       |     |       |     |       |     |       |     |       |     |        |    |                                                                                                                                                                                                                                                                                                                                                                                                                                                                                                                                                 |           |       |      |     |       |      |       |      |       |      |       |      |       |      |       |      |       |      |       |      |        |      |
| 30-40                      | 2921                                                                                                                                                                                                                                                                                                                                                                                                                                                                                                                                 |                                                                                      |       |      |      |       |     |       |     |       |     |       |     |       |     |       |     |       |     |       |     |        |    |                                                                                                                                                                                                                                                                                                                                                                                                                                                                                                                                                 |           |       |      |     |       |      |       |      |       |      |       |      |       |      |       |      |       |      |       |      |        |      |
| 40-50                      | 3945                                                                                                                                                                                                                                                                                                                                                                                                                                                                                                                                 |                                                                                      |       |      |      |       |     |       |     |       |     |       |     |       |     |       |     |       |     |       |     |        |    |                                                                                                                                                                                                                                                                                                                                                                                                                                                                                                                                                 |           |       |      |     |       |      |       |      |       |      |       |      |       |      |       |      |       |      |       |      |        |      |
| 50-60                      | 4986                                                                                                                                                                                                                                                                                                                                                                                                                                                                                                                                 |                                                                                      |       |      |      |       |     |       |     |       |     |       |     |       |     |       |     |       |     |       |     |        |    |                                                                                                                                                                                                                                                                                                                                                                                                                                                                                                                                                 |           |       |      |     |       |      |       |      |       |      |       |      |       |      |       |      |       |      |       |      |        |      |
| 60-70                      | 6549                                                                                                                                                                                                                                                                                                                                                                                                                                                                                                                                 |                                                                                      |       |      |      |       |     |       |     |       |     |       |     |       |     |       |     |       |     |       |     |        |    |                                                                                                                                                                                                                                                                                                                                                                                                                                                                                                                                                 |           |       |      |     |       |      |       |      |       |      |       |      |       |      |       |      |       |      |       |      |        |      |
| 70-80                      | 7363                                                                                                                                                                                                                                                                                                                                                                                                                                                                                                                                 |                                                                                      |       |      |      |       |     |       |     |       |     |       |     |       |     |       |     |       |     |       |     |        |    |                                                                                                                                                                                                                                                                                                                                                                                                                                                                                                                                                 |           |       |      |     |       |      |       |      |       |      |       |      |       |      |       |      |       |      |       |      |        |      |
| 80-90                      | 7157                                                                                                                                                                                                                                                                                                                                                                                                                                                                                                                                 |                                                                                      |       |      |      |       |     |       |     |       |     |       |     |       |     |       |     |       |     |       |     |        |    |                                                                                                                                                                                                                                                                                                                                                                                                                                                                                                                                                 |           |       |      |     |       |      |       |      |       |      |       |      |       |      |       |      |       |      |       |      |        |      |
| 90-100                     | 4146                                                                                                                                                                                                                                                                                                                                                                                                                                                                                                                                 |                                                                                      |       |      |      |       |     |       |     |       |     |       |     |       |     |       |     |       |     |       |     |        |    |                                                                                                                                                                                                                                                                                                                                                                                                                                                                                                                                                 |           |       |      |     |       |      |       |      |       |      |       |      |       |      |       |      |       |      |       |      |        |      |

## Reference

- (1) Hagberg, A. A.; Schult, D. A.; Swart, P. J. Exploring Network Structure, Dynamics, and Function Using NetworkX. In *7th Python in Science Conference (SciPy 2008)*; 2008; pp 11–15.
- (2) Liu, Z.; Zubatiuk, T.; Roitberg, A.; Isayev, O. Auto3D: Automatic Generation of the Low-Energy 3D Structures with ANI Neural Network Potentials. *J. Chem. Inf. Model.* **2022**, *62*, 5373–5382.
- (3) Zubatyuk, R.; Smith, J. S.; Nebgen, B. T.; Tretiak, S.; Isayev, O. Teaching a Neural Network to Attach and Detach Electrons from Molecules. *Nat. Commun.* **2021**, *12*, 1–11.
- (4) Gao, X.; Ramezanghorbani, F.; Isayev, O.; Smith, J. S.; Roitberg, A. E. TorchANI: A Free and Open Source PyTorch-Based Deep Learning Implementation of the ANI Neural Network Potentials. *J. Chem. Inf. Model.* **2020**, *60*, 3408–3415.
- (5) Moriwaki, H.; Tian, Y. S.; Kawashita, N.; Takagi, T. Mordred: A Molecular Descriptor Calculator. *J. Cheminform.* **2018**, *10*, 14.
- (6) Ahneman, D. T.; Estrada, J. G.; Lin, S.; Dreher, S. D.; Doyle, A. G. Predicting Reaction Performance in C–N Cross-Coupling Using Machine Learning. *Science (80-. )*. **2018**, *360*, 186–190.
- (7) Wiest, O.; Saebi, M.; Nan, B.; Herr, J. E.; Wahlers, J.; Guo, Z.; Zuranski, A.; Kogej, T.; Norrby, P.-O.; Doyle, A. G.; Chawla, N. V. On the Use of Real-World Datasets for Reaction Yield Prediction. *Chem. Sci.* **2023**, *14*, 4997–5005.
