# Supplementary material for: The challenge of balancing model sensitivity and robustness in predicting yields: a benchmarking study of amide coupling reactions
Source: Royal Society of Chemistry journal article supplement (doi:10.1039/d3sc03902a), 2023-01-01
Supplement: d3sc03902a2.pdf [file d3sc03902a2.pdf]

## Supporting Information

# The Challenge of Balancing Model Sensitivity and Robustness in Predicting Yields: A Benchmarking Study of Amide Coupling Reactions

Zhen Liu<sup>1</sup>, Yurii S. Moroz<sup>2,3,4</sup>, Olexandr Isayev<sup>1\*</sup>

<sup>1</sup>Department of Chemistry, Mellon College of Science, Carnegie Mellon University, Pittsburgh, Pennsylvania 15213, USA

<sup>2</sup>*Enamine Ltd, Kyiv, 02660, Ukraine*

<sup>3</sup>*Chemspace LLC, Kyiv, 02094, Ukraine*

<sup>4</sup>*Taras Shevchenko National University of Kyiv, Kyiv, 01601, Ukraine*

\* Correspondence: olexandr@olexandrisayev.com (O.I.)

## Examples of reactivity cliffs

The similarity of reactions was determined using the reaction fingerprint, and two reactions were deemed similar if their cosine similarity exceeded 0.90. Reactions were considered "cliffs" when their similarity surpassed 0.9, yet the yield difference was greater than 30. In our amide coupling datasets, we identified 6,365 reactivity cliffs. These examples serve to illustrate that even a minor alteration in molecular structure can result in a substantial variation in reaction yield. This observation underscores that the yield prediction surface is non-smooth, highlighting the challenges for accurately predicting reaction yields.

| Reaxys ID | Reaction                                                                             | Yield (%) | Condition                                                 |
|-----------|--------------------------------------------------------------------------------------|-----------|-----------------------------------------------------------|
| 37377749  | 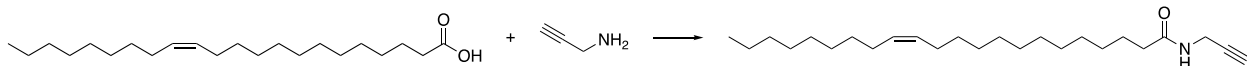   | 61        | 18 °C, 20 h;<br>DMAP, DIC, DCM                            |
| 37377774  |    | 13        | 18 °C, 20 h;<br>DMAP, DIC, DCM                            |
| 28563907  |    | 81        | 100 h;<br>benzotriazol-1-ol, EDC,<br>DMF                  |
| 42264425  |   | 13        | 10 °C, 100 h;<br>benzotriazol-1-ol, EDC,<br>DMF           |
| 28683797  |  | 20        | 16.0 °C, 20 h;<br>Inert atmosphere,<br>pyridine, DCC, DMF |

|          |  |    |                                                                                  |
|----------|--|----|----------------------------------------------------------------------------------|
| 28683737 |  | 96 | 16 °C, 20 h;<br>Inert atmosphere,<br>pyridine, DCC, DMF                          |
| 51739779 |  | 2  | 1 °C, 25 h;<br>DMAP, EDC, DCM                                                    |
| 52011231 |  | 83 | 2 °C, 20 h;<br>DMAP, EDC, DCM                                                    |
| 42724738 |  | 97 | 25 h;<br>2,6-dimethylpyridine;<br>1-hydroxy-7-aza-<br>benzotriazole;<br>EDC, DMF |
| 42724744 |  | 17 | 25 h;<br>2,6-dimethylpyridine;<br>1-hydroxy-7-aza-<br>benzotriazole;<br>EDC, DMF |
| 36270730 |  | 4  | 45 h;<br>Inert atmosphere, DMAP;<br>EDC, DCM                                     |

|          |  |      |                                                                 |
|----------|--|------|-----------------------------------------------------------------|
| 36270732 |  | 93   | 45 h;<br>Inert atmosphere, DMAP;<br>EDC, DCM                    |
| 9190843  |  | 0.23 | benzotriazol-1-ol;<br>EDC, DCM                                  |
| 2107062  |  | 93   | 20 h;<br>4-methyl-morpholine;<br>benzotriazol-1-ol;<br>EDC, DMF |
| 51739741 |  | 29   | 2 °C, 25 h;<br>DMAP;<br>EDC, DCM                                |
| 51739653 |  | 100  | 2 °C, 20 h;<br>DMAP;<br>EDC, DCM                                |

|          |                                                                                    |    |                                                          |
|----------|------------------------------------------------------------------------------------|----|----------------------------------------------------------|
| 42264445 | 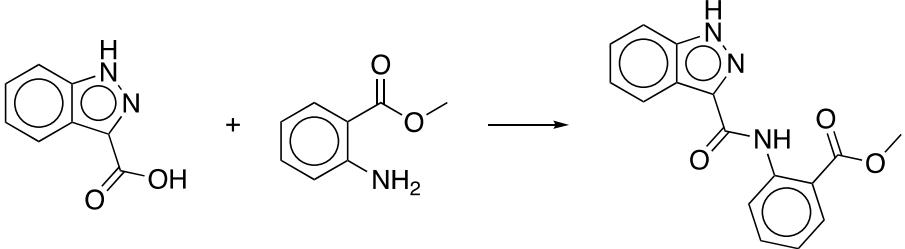 | 6  | <p>10 °C, 100 h;<br/>benzotriazol-1-ol;<br/>EDC, DMF</p> |
| 42264442 |  | 82 | <p>10 °C, 100 h;<br/>benzotriazol-1-ol;<br/>EDC, DMF</p> |
| 5267967  |  | 9  | <p>12 °C, 80 h;<br/>benzotriazol-1-ol;<br/>DCC, DMF</p>  |
| 4832409  |  | 96 | <p>12 °C, 80 h;<br/>benzotriazol-1-ol;<br/>DCC, DMF</p>  |

## Examples of uncertain reactions

The reactions were deemed to have "uncertain" yields when the carboxylic acid, amine, and product were the same, yet the yields (obtained from the Reaxys database) differed by at least 30. A group of uncertain reactions share the same catalyst, despite slight variations in the experimental context. Within our amide coupling dataset, we identified 649 reactions with uncertain yields. These instances emphasize that reproducibility poses an additional challenge when constructing accurate yield prediction models.

| Reaxys ID | Reaction                                                                             | Yield records in the Reaxys database (%) |
|-----------|--------------------------------------------------------------------------------------|------------------------------------------|
| 712688    | 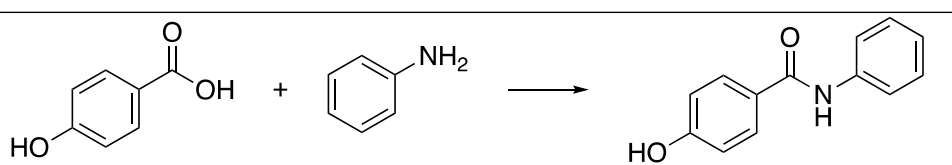   | 29, 71                                   |
| 1889311   |    | 66, 70, 85, 87,                          |
| 5211116   |   | 84, 96                                   |
| 44962717  |  | 32.5, 97.5                               |
| 28286573  |  | 23, 62, 62, 99                           |

|         |                                                                                                                                                                         |            |
|---------|-------------------------------------------------------------------------------------------------------------------------------------------------------------------------|------------|
| 1789336 | 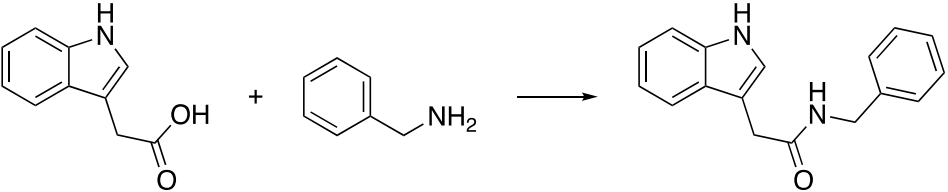 <p>Indole-3-acetic acid + benzylamine → N-benzyl-L-tryptophan</p>                     | 35, 85, 90 |
| 1820687 |  <p>Cyclic amide with tert-butyl ester + primary amine → bicyclic urea derivative</p> | 40, 40, 93 |
| 3747743 |  <p>2-iodobenzoic acid + benzylamine → N-benzyl-2-iodobenzamide</p>                   | 60, 60, 99 |
